# Supplementary material for: Green Technology Collaboration Network Analysis of China’s Transportation Sector: A Patent-Based Analysis
Source: Hindawi journal article supplement (doi:10.1155/2021/9961071), 2021-04-05
Supplement: f1 [file 9961071.f1.docx]

**Appendix A**

Table A.1 IPC green inventory list.

| **No.** | **IPC** | **Technology topic** |
| --- | --- | --- |
| 1 | B60K6/00 | Vehicles in general |
| 2 | B60K6/20 | Vehicles in general |
| 3 | B60W20/00 | Vehicles in general |
| 4 | F16H3 | Vehicles in general |
| 5 | F16H48 | Vehicles in general |
| 6 | H02K29/08 | Vehicles in general |
| 7 | H02K49/10 | Vehicles in general |
| 8 | B60L7/10 | Vehicles in general |
| 9 | B60L7/12 | Vehicles in general |
| 10 | B60L7/14 | Vehicles in general |
| 11 | B60L7/16 | Vehicles in general |
| 12 | B60L7/18 | Vehicles in general |
| 13 | B60L7/20 | Vehicles in general |
| 14 | B60L7/22 | Vehicles in general |
| 15 | B60L8/00 | Vehicles in general |
| 16 | B60L9/00 | Vehicles in general |
| 17 | B60L50/50 | Vehicles in general |
| 18 | B60L50/51 | Vehicles in general |
| 19 | B60L50/52 | Vehicles in general |
| 20 | B60L50/53 | Vehicles in general |
| 21 | B60L50/60 | Vehicles in general |
| 22 | B60L50/61 | Vehicles in general |
| 23 | B60L50/62 | Vehicles in general |
| 24 | B60L50/64 | Vehicles in general |
| 25 | B60L50/70 | Vehicles in general |
| 26 | B60L50/71 | Vehicles in general |
| 27 | B60L50/72 | Vehicles in general |
| 28 | B60L50/75 | Vehicles in general |
| 29 | B60L50/90 | Vehicles in general |
| 30 | B60L53 | Vehicles in general |
| 31 | B60L55 | Vehicles in general |
| 32 | B60L58 | Vehicles in general |
| 33 | F02B43/00 | Vehicles in general |
| 34 | F02M21/02 | Vehicles in general |
| 35 | F02M27/02 | Vehicles in general |
| 36 | B60K16/00 | Vehicles in general |
| 37 | H02J7/00 | Vehicles in general |
| 38 | B62D35/00 | Vehicles other than rail vehicles |
| 39 | B62D35/02 | Vehicles other than rail vehicles |
| 40 | B63B1/34 | Vehicles other than rail vehicles |
| 41 | B63B1/36 | Vehicles other than rail vehicles |
| 42 | B63B1/38 | Vehicles other than rail vehicles |
| 43 | B63B1/40 | Vehicles other than rail vehicles |
| 44 | B62K | Vehicles other than rail vehicles |
| 45 | B62M1/00 | Vehicles other than rail vehicles |
| 46 | B62M3/00 | Vehicles other than rail vehicles |
| 47 | B62M5/00 | Vehicles other than rail vehicles |
| 48 | B62M6/00 | Vehicles other than rail vehicles |
| 49 | B61 | Rail vehicles |
| 50 | B61D17/02 | Rail vehicles |
| 51 | B63H9/00 | Marine vessel propulsion |
| 52 | B63H13/00 | Marine vessel propulsion |
| 53 | B63H19/02 | Marine vessel propulsion |
| 54 | B63H19/04 | Marine vessel propulsion |
| 55 | B63H16/00 | Marine vessel propulsion |
| 56 | B63H21/18 | Marine vessel propulsion |
| 57 | B64G1/44 | Cosmonautic vehicles using solar energy |
